# Supplementary material
Source: publisher figshare collection journal article supplement (https://sage.figshare.com/ndownloader/files/34293903)
Supplement: Supplementary file 1 [file 34293903]

## Supplementary Materials

Table S1: PET and MRI Data Acquisition Parameters

| Parameter        | Unit            | Value              |
|------------------|-----------------|--------------------|
| <b>PET</b>       |                 |                    |
| Matrix           |                 | 192 x 192          |
| FOV              | mm              | 300                |
| Voxel size       | mm              | 1.56 x 1.56 x 2.78 |
| Slice thickness  | mm              | 2.78               |
| Scan duration    | min             | 10:00              |
| <b>MRA</b>       |                 |                    |
| TR/TE            | ms              | 22/2.4             |
| Number of slices |                 | 120                |
| Flip angle       | degrees         | 15                 |
| Slice thickness  | mm              | 1.2                |
| Matrix           |                 | 512 x 512          |
| FOV              | mm <sup>2</sup> | 220 x 220          |
| Voxel size       | mm <sup>2</sup> | 0.43 x 0.43        |
| Scan duration    | min             | 4:03               |
| <b>GRE</b>       |                 |                    |

|                  |         |           |
|------------------|---------|-----------|
| TR/TE            | ms      | 667/15    |
| Number of slices |         | 30        |
| Flip angle       | degrees | 20        |
| FOV              | cm      | 24 x 24   |
| Matrix           |         | 256 x 256 |
| Slice thickness  | mm      | 5         |
| Scan duration    | min     | 1:56      |

#### Single-PLD PCASL

|                           |         |                                                           |
|---------------------------|---------|-----------------------------------------------------------|
| Labeling pulse shape      |         | Hanning                                                   |
| Labeling pulse duration   | ms      | 0.5                                                       |
| Labeling pulse spacing    | ms      | 1.22                                                      |
| Mean B1                   | $\mu$ T | 1.4                                                       |
| Mean gradient strength    | mT/m    | 0.7                                                       |
| Maximal gradient strength | mT/m    | 7                                                         |
| Bolus duration            | ms      | 1450                                                      |
| TR/TE                     | ms      | 4854/10.7                                                 |
| PLD                       | ms      | 2025                                                      |
| NEX                       |         | 3                                                         |
| Acquisition Matrix        |         | 8 interleaved spirals X 512<br>sampling points per spiral |

|                                         |                 |                   |
|-----------------------------------------|-----------------|-------------------|
| Number of slices                        |                 | 36                |
| FOV                                     | cm <sup>3</sup> | 24                |
| Acquisition Voxel size                  | mm              | 3.73 x 3.73 x 4   |
| Reconstruction Voxel size               | mm              | 1.875 x 1.875 x 4 |
| Number of Background suppression pulses |                 | 5                 |
| Scan duration                           | min             | 4:13              |

#### Multi-PLD PCASL

|                           |      |                                                           |
|---------------------------|------|-----------------------------------------------------------|
| Labeling pulse shape      |      | Hanning                                                   |
| Labeling pulse duration   | ms   | 0.5                                                       |
| Labeling pulse spacing    | ms   | 1.22                                                      |
| Mean B1                   | μT   | 1.8                                                       |
| Mean gradient strength    | mT/m | 0.7                                                       |
| Maximal gradient strength | mT/m | 4.5                                                       |
| Bolus duration            | ms   | 1700                                                      |
| TR/TE                     | ms   | 5652/10.7                                                 |
| PLD                       | ms   | 300, 2000, 3700                                           |
| Acquisition Matrix        |      | 4 interleaved spirals X 512<br>sampling points per spiral |
| NEX                       |      | 2                                                         |
| Number of slices          |      | 36                                                        |

|                                         |                 |                   |
|-----------------------------------------|-----------------|-------------------|
| FOV                                     | cm <sup>3</sup> | 24                |
| Acquisition Voxel size                  | mm              | 5.77 x 5.77 x 4   |
| Reconstruction Voxel size               | mm              | 1.875 x 1.875 x 4 |
| Number of Background suppression pulses |                 | 5                 |
| Scan duration                           | min             | 4:47              |

## DSC

|                        |         |                   |
|------------------------|---------|-------------------|
| TR/TE                  | ms      | 1800/40           |
| NEX                    |         | 1                 |
| Flip angle             | degrees | 60                |
| Slice thickness        | mm      | 5                 |
| Pre-delay              | s       | 18                |
| Number of slices       |         | 21                |
| FOV                    | cm      | 22 x 22           |
| Matrix                 |         | 128 x 128         |
| Timepoints             |         | 60                |
| Acquisition Voxel size | mm      | 1.719 x 1.719 x 5 |
| Scan duration          | min     | 1:48              |

Table S2: Comparison between PET, Single- and Multi-PLD PCASL techniques

|                                                | PET                   | Single-PLD PCASL                     | Multi-PLD PCASL                      |
|------------------------------------------------|-----------------------|--------------------------------------|--------------------------------------|
| <b>Quantitative Comparison</b>                 |                       |                                      |                                      |
| Image Resolution (mm <sup>3</sup> )            | 1.56 x 1.56 x 2.78    | 3.73 x 3.73 x 4                      | 5.77 x 5.77 x 4                      |
| FOV (cm <sup>3</sup> )                         | 30                    | 24                                   | 24                                   |
| Scan duration (min)                            | 10                    | 4:13                                 | 4:47                                 |
| Image reconstruction time (min)                | 5                     | Less than 1min                       | Less than 1min                       |
| CBF change in affected regions (ml/100g/min)   | 15.6                  | 12.7                                 | 18.8                                 |
| CBF change in unaffected regions (ml/100g/min) | 27.7                  | 15.3                                 | 23.7                                 |
| Mean CVR of affected regions (%)               | 30.8                  | 24.1                                 | 34.3                                 |
| Mean CVR of unaffected regions (%)             | 33.2                  | 24.5                                 | 37.2                                 |
| <b>Qualitative Comparison</b>                  |                       |                                      |                                      |
| Tracer                                         | <sup>15</sup> O-water | Blood water as the endogenous tracer | Blood water as the endogenous tracer |
| Hemodynamic model used analysis                | 1-compartment model   | General kinetic model                | General kinetic model                |
| Parameters measured                            | CBF and CVR           | CBF and CVR                          | CBF, CVR, and ATT                    |

**(A) Single-PLD PCASL vs PET**

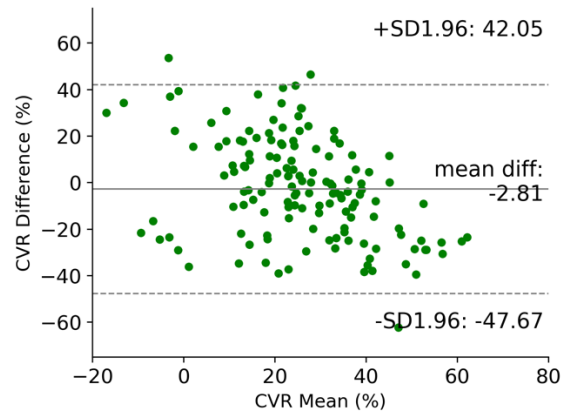

**(B) Multi-PLD PCASL vs PET**

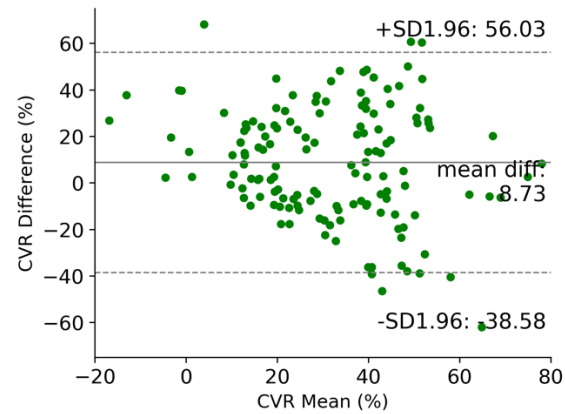

**(C) Concordance Correlation Coefficient Between ASL and PET**

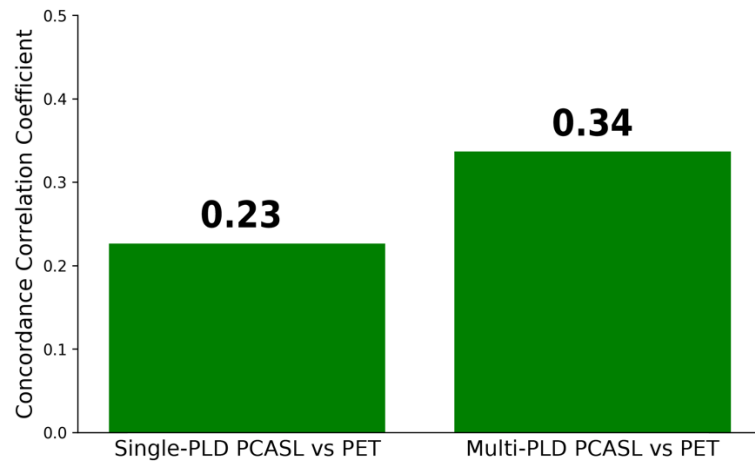

Figure S1: Relationship between CVR of all the regions (affected and unaffected) measured by ASL and PET. There were biases of 2.8% and 8.73% for single- and multi-PLD PCASL respectively. Multi-PLD PCASL achieved a stronger correlation with the reference PET technique.

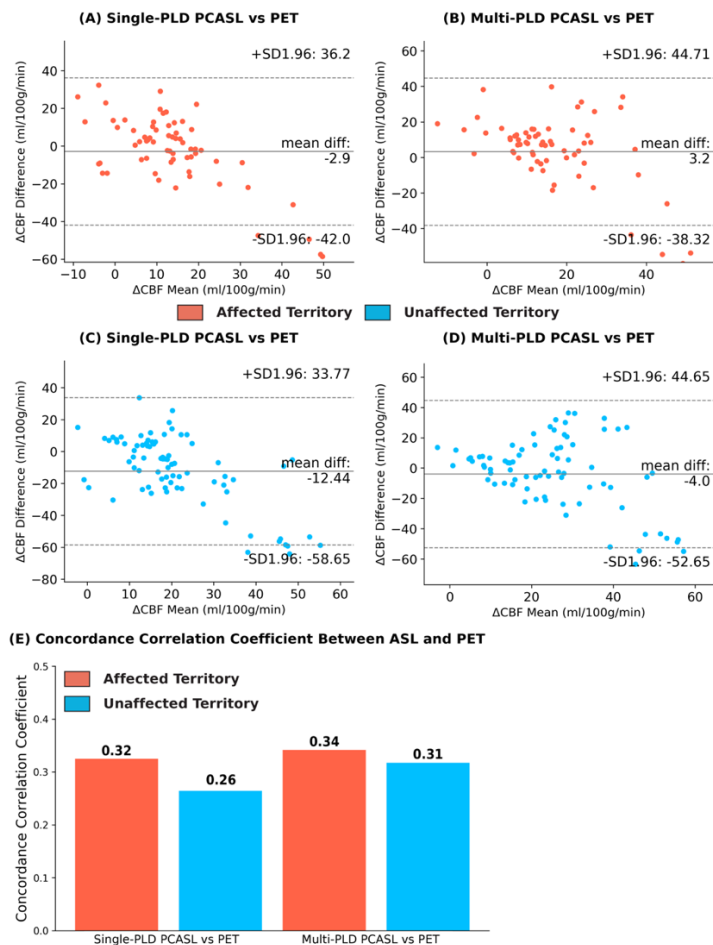

Figure S2: Relationship between  $\Delta\text{CBF}$  measured by ASL and PET. Between multi-PLD PCASL and PET techniques, there were a bias of 3.2 and 4.0 ml/100g/min in the  $\Delta\text{CBF}$  of affected and unaffected territories respectively. Both ASL techniques had a similar concordance correlation coefficient in regions affected by stenosis/occlusion while multi-PLD PCASL showed higher agreement with PET in normal (unaffected) territories.
